# Supplementary material
Source: PubMed Central journal article supplement (PMC4104986)
Supplement: NIHMS606696-supplement-1.pdf [file NIHMS606696-supplement-1.pdf]

**Supplementary Table 1. shRNA sequences used for RNAi**

|               |                                                                           |
|---------------|---------------------------------------------------------------------------|
| PKM2          | 5'-<br>CCGGATCATTGCCGTGACTCGAAATCTCGAGATTTTCGAGTCACGGC<br>AATGATTTTTTG-3' |
| HIF1 $\alpha$ | 5'-<br>CCGGTGGATAGCGATATGGTCAATGCTCGAGCATTGACCATATCGC<br>TATCCATTTTTG-3'  |
| GLUT1         | 5'-<br>CCGGGCCATGAGCTTTGTCTGTATTCTCGAGAATACAGACAAAGCT<br>CATGGCTTTTTG-3'  |
| LDHA          | 5'-<br>CCGGGTTCCCAGTTAAGTCGTATAACTCGAGTTATACGACTTAACT<br>GGGAACTTTTG-3'   |
| PDK1          | 5'-<br>CCGGGCTGAGTATTTCTTTCAAGTTCTCGAGAAGTTGAAAGAAATA<br>CTCAGCTTTTTG-3'  |
| GRP81         | 5'-<br>CCGGCCCTTGTATATTACTTCTCAACTCGAGTTGAGAAGTAATATA<br>CAAGGGTTTTT-3'   |

**Supplementary Table 2. Primer sequences used for RT-QPCR analysis**

|                         |           |                               |
|-------------------------|-----------|-------------------------------|
| PKM2                    | sense     | 5'-TCGCATGCAGCACCTGATT-3'     |
|                         | antisense | 5'-CCTCGAATAGCTGCAAGTGGTA-3'  |
| HIF1 $\alpha$           | sense     | 5'-ACCTTCATCGGAAACTCCAAAG-3'  |
|                         | antisense | 5'-CTGTTAGGCTGGGAAAAGTTAGG-3' |
| GLUT1                   | sense     | 5'-ATGGATCCCAGCAGCAAG-3'      |
|                         | antisense | 5'-CCAGTGTTATAGCCGAACTGC-3'   |
| PDK1                    | sense     | 5'-CCACTGAGGAAGATCGACAGAC-3'  |
|                         | antisense | 5'-AGAGGCGTGATATGGGCAATCC-3'  |
| 18S<br>ribosomal<br>RNA | sense     | 5'-CTTAGAGGGACAAGTGGCG-3'     |
|                         | antisense | 5'-ACGCTGAGCCAGTCAGTGTA-3'    |
